# Supplementary material for: Effect of fatty acids on the accelerated sulfur vulcanization of rubber by active zinc/carboxylate complexes
Source: Royal Society of Chemistry journal article supplement (doi:10.1039/c9ra10358a), 2020-01-01
Supplement: c9ra10358a1.pdf [file c9ra10358a1.pdf]

## Supporting Information

### **Effect of fatty acids on the accelerated sulfur vulcanization of rubber by active zinc/carboxylate complexes**

Preeyanuch Junkong,<sup>a,b</sup> Rie Morimoto,<sup>c</sup> Kosuke Miyaji,<sup>a,c</sup> Atitaya Tohsan,<sup>a,d</sup>  
Yuta Sakaki,<sup>a,c</sup> Yuko Ikeda,<sup>\*a,e</sup>

*<sup>a</sup>Center for Rubber Science and Technology, Kyoto Institute of Technology, Matsugasaki,  
Sakyo, Kyoto 606-8585, Japan.*

*<sup>b</sup>Faculty of Science, Mahidol University, Ratchathewi, Bangkok 10400, Thailand.*

*<sup>c</sup>Graduate School of Science and Technology, Kyoto Institute of Technology, Matsugasaki,  
Sakyo, Kyoto 606-8585, Japan.*

*<sup>d</sup>Faculty of Engineering, King Mongkut's University of Technology North Bangkok, 1518  
Pracharat 1 Rd, Wongsawang, Bangsue, Bangkok 10800, Thailand.*

*<sup>e</sup>Faculty of Molecular Chemistry and Engineering, Kyoto Institute of Technology, Matsugasaki,  
Sakyo, Kyoto 606-8585, Japan.*

\*Corresponding author

E-mail: yuko@kit.ac.jp.

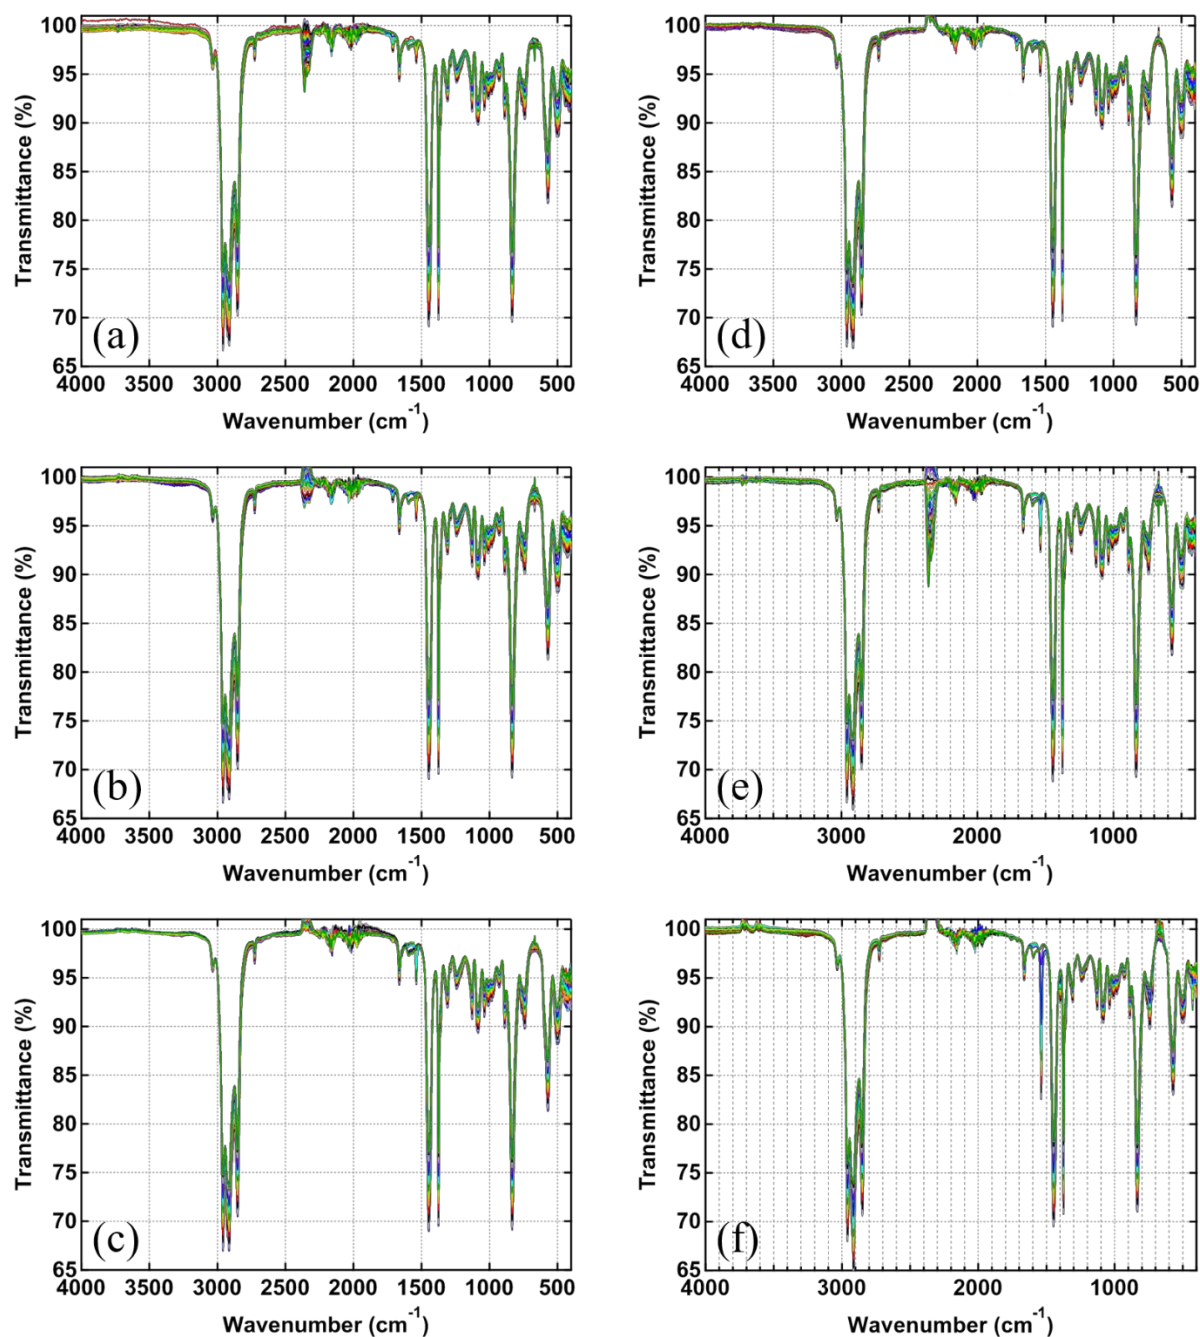

**Figure S1** FT-IR spectra of the heating process from 35 to 144 °C and the constant temperature condition at 144 °C for (a) IR-ZnO(0.5)-LaH(1.4), (b) IR-ZnO(0.5)-MyH(1.6), (c) IR-ZnO(0.5)-PaH(1.8), (d) IR-ZnO(0.5)-StH(2.0), (e) IR-ZnO(0.5)-ArH(2.2), and (f) IR-ZnSt2(4.5) in the range of 4000–400  $\text{cm}^{-1}$ .

**Table S1** Identification of the FT-IR bands shown in Figure S1

| Wavenumber (cm <sup>-1</sup> ) | Functional group                     | Type of vibration                  |
|--------------------------------|--------------------------------------|------------------------------------|
| 3030                           | C-H (cis alkenes, aromatic)          | antisymmetric stretching           |
| 2960, 2910                     | C-H (methyl groups)                  | antisymmetric,symmetric stretching |
| 2920, 2855                     | C-H (methylene groups)               | antisymmetric,symmetric stretching |
| 1760                           | C=O (carboxylic acid monomers)       | antisymmetric stretching           |
| 1715                           | C=O (carboxylic acid dimers)         | antisymmetric stretching           |
| 1660                           | C=C (alkenes)                        | symmetric stretching               |
| 1600-1560                      | COO <sup>-</sup> (metal carboxylate) | antisymmetric stretching           |
| 1540                           | C=O (metal carboxylate)              | stretching                         |
| 1450                           | C-H (methylene groups)               | scissor bending                    |
| 1430                           | COO <sup>-</sup> (metal carboxylate) | symmetric stretching               |
| 1375                           | C-H (methyl groups)                  | rock bending                       |
| 833                            | C-H (alkenes)                        | out of plane bending               |

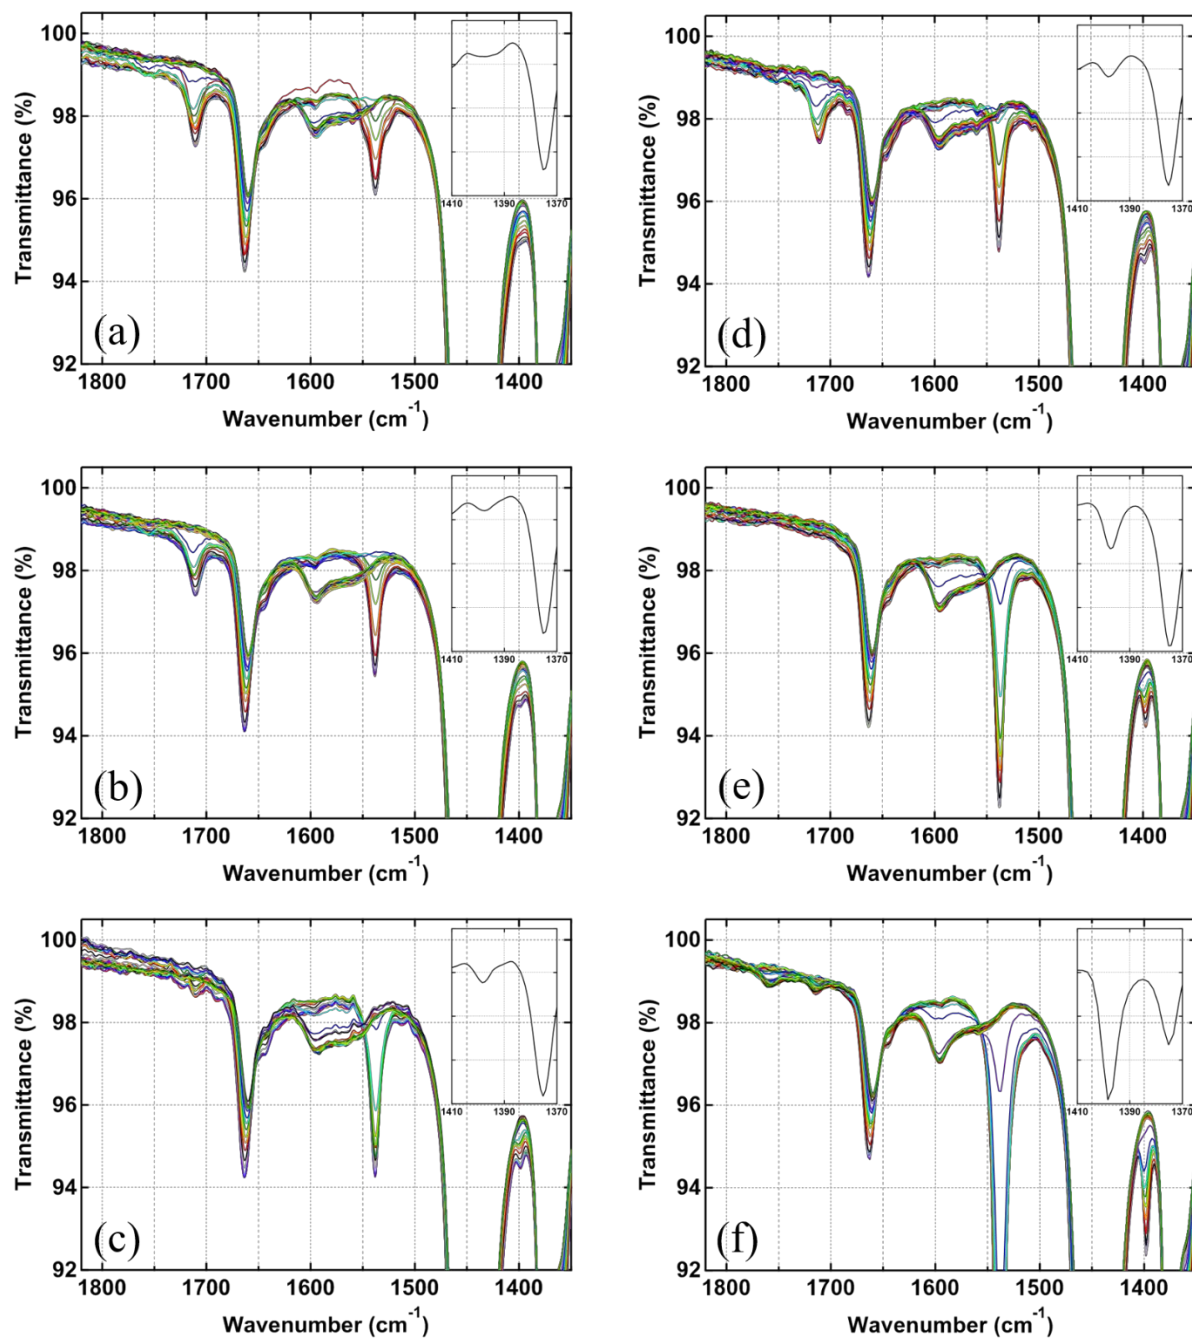

**Figure S2** FT-IR spectra of the heating process from 35 to 144 °C and the constant temperature condition at 144 °C for (a) IR-ZnO(0.5)-LaH(1.4), (b) IR-ZnO(0.5)-MyH(1.6), (c) IR-ZnO(0.5)-PaH(1.8), (d) IR-ZnO(0.5)-StH(2.0) and (e) IR-ZnO(0.5)-ArH(2.2) in the range of 1820–1350  $\text{cm}^{-1}$ . The inset shows the differential FT-IR spectrum of the samples subtracted by raw isoprene rubber spectrum at 35 °C in the range of 1410–1370  $\text{cm}^{-1}$ .
